# Supplementary material for: Fatostatin Displays High Antitumor Activity in Prostate Cancer by Blocking SREBP-Regulated Metabolic Pathways and Androgen Receptor Signaling
Source: Oxford University Press journal article supplement (doi:10.1158/1535-7163.mct-13-0797), 2014-02-03

## **Supplementary Information**

### **Fatostatin Displays High Anti-Tumor Activity in Prostate Cancer by Blocking SREBP-Regulated Metabolic Pathways and Androgen Receptor Signaling**

Xiangyan Li, Yi-Ting Chen, Peizhen Hu and Wen-Chin Huang

#### **Supplementary Methods**

#### **Supplementary Figure Legends**

#### **Supplementary Table S1**

#### **Supplementary Figure S1**

#### **Supplementary Figure S2**

#### **Supplementary Figure S3**

## **Supplementary Methods**

### **Immunofluorescence staining**

Prostate cancer cells treated with vehicle or fatostatin (10  $\mu\text{mol/L}$ ) were fixed with 10% formalin and permeabilized with 0.1% Triton X-100 in PBS. After washing with PBS, cells were blocked with 1% BSA for 1 hours. Anti-SREBP-1 (Santa Cruz Technology) and SREBP-2 (Abcam) and AR (Milipore) primary antibodies were added and incubated for overnight at 4 °C. After washing twice in PBS, secondary anti-rabbit IgG-R or IgG-FITC (sc-2095 and sc-2090, Santa Cruz Technology) was used and incubated for 1 hour. For the examination of nuclear morphology, cells were stained with DAPI solution (1  $\mu\text{g/mL}$ ) for 10 minutes. Fluorescence images were visualized by fluorescence microscopy (Nikon Eclipse Ti)(1).

### **Supplementary References**

1. Walker AK, Yang F, Jiang K, Ji JY, Watts JL, Purushotham A, et al. Conserved role of SIRT1 orthologs in fasting-dependent inhibition of the lipid/cholesterol regulator SREBP. *Genes Dev.* 2010;24:1403-17.

## **Supplementary Figure Legends**

**Supplementary Figure S1.** Chemical structure of fatostatin

**Supplementary Figure S2.** Fatostatin blocks nuclear abundance of SREBP-1 and SREBP-2 in LNCaP and C4-2B cells. Cells were treated with vehicle or fatostatin for 24 hours and then stained with antibodies against SREBP-1 or SREBP-2 along with DAPI, and were visualized by immunofluorescence. Representative images are shown. Scale bar = 50  $\mu\text{m}$ .

**Supplementary Figure S3.** Fatostatin inhibits the transcriptional activity of SREBPs determined by the SREs (sterol regulatory elements)-luciferase (Luc) reporter assay. Fatostatin significantly decreased the SRE-Luc activity in the presence of SREBP-1 (A) or SREBP-2 (B) expression vector but didn't affect the SRE-Luc activity in the presence of dominant negative forms (A-SREBP1 or A-SREBP2). The relative luciferase activity was normalized by  $\beta$ -galactosidase activity and assigned as 100% in the presence of SREBP-1 or -2 expression vector. The data were shown as mean  $\pm$  SD, \*,  $P < 0.05$  and \*\*,  $P < 0.01$ .

**Supplementary Figure S4.** Fatostatin blocks AR nuclear translocation in LNCaP and C4-2B cells. Cells were exposed to vehicle or fatostatin (10  $\mu\text{mol/L}$ ) for 12 hours, stained with anti-AR antibody and visualized by immunofluorescence. Representative images are shown. Scale bar = 20  $\mu\text{m}$ .

**Supplementary Table S1.** The Sequences of primers used for qRT-PCR

| Gene           | Sequence (5' to 3')                                         |
|----------------|-------------------------------------------------------------|
| ACL            | F: TGTAACAGAGCCAGGAACCC<br>R: CTGTACCCCAGTGGCTGTTT          |
| FASN           | F: CGGTACGCGACGGCTGCCTG<br>R: GCTGCTCCACGAACTCAAACACCG      |
| SCD-1          | F: CACTTGGGAGCCCTGTATGG<br>R: AGCCGAGCTTTGTAAGAGCG          |
| HMGCS1         | F: GAGGGCTTCGTGGGACACATA<br>R: GCCACTGGGATGGATCTTT          |
| HMGCR          | F: GTCATTCCAGCCAAGGTTGT                                     |
|                | R: GGGACCACTTGCTTCCATTA                                     |
| MVK            | F: CCTTGTGGCTGGCGTCAGAAA<br>R: CGAGGGCATTTCAGATGGTGCT       |
| MVD            | F: ACCACGGGGACACCAAGGT<br>R: CCACACAGCAGCCACAAACTC          |
| INSIG1         | F: GGACGACAGTTAGCTATGGGTGTT<br>R: GAGTCATTTGTACAGTCAGCCCGA  |
| SCAP           | F: TATCTCGGGCCTTCTACAACCA<br>R: ACACAACTCCTCCAAGCTCCTG      |
| $\beta$ -actin | F: CAAGGCCAACCGCGAGAAGATGAC<br>R: GCCAGAGGCGTACAGGGATAGCACA |

**Supplementary Figure S1**

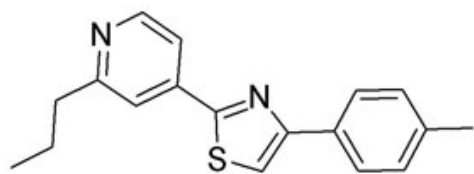

Supplementary Figure S2.

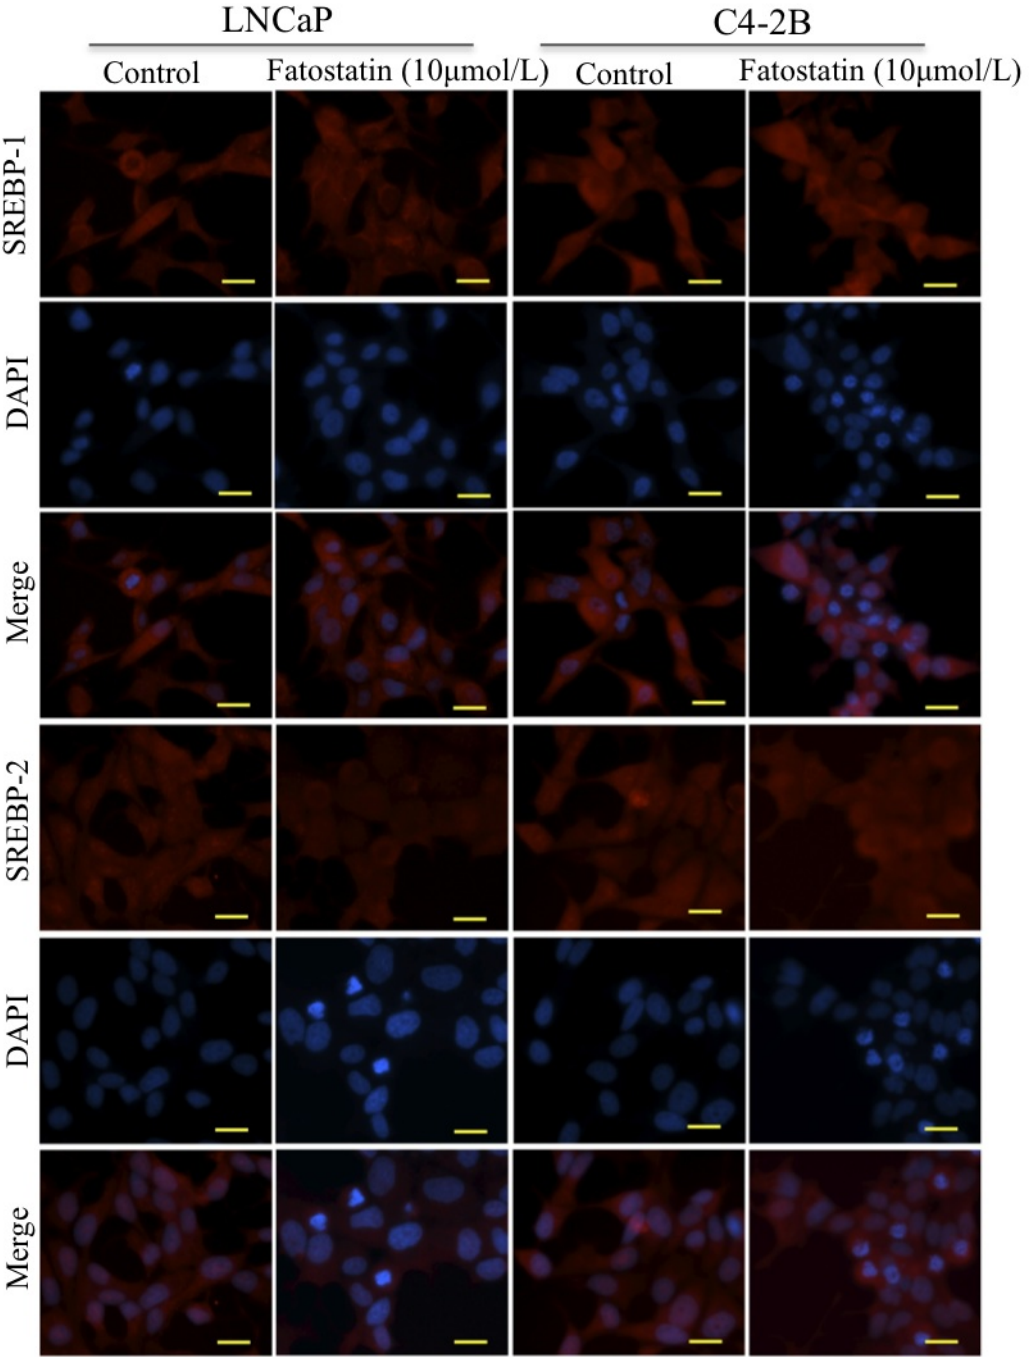

Supplementary Figure S3

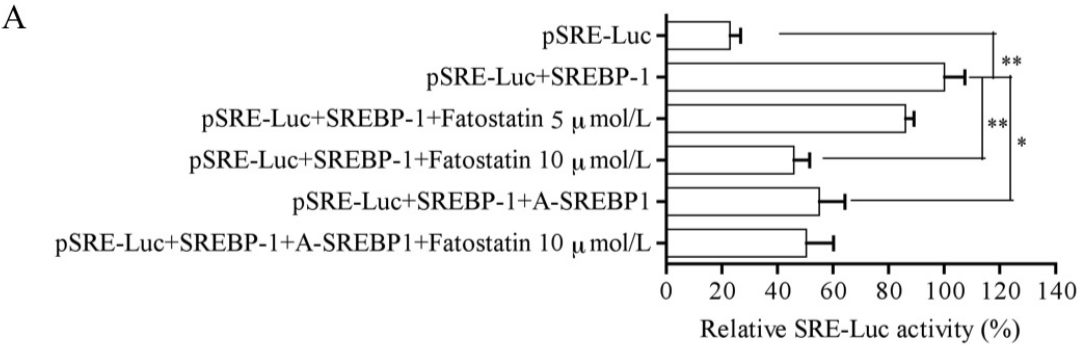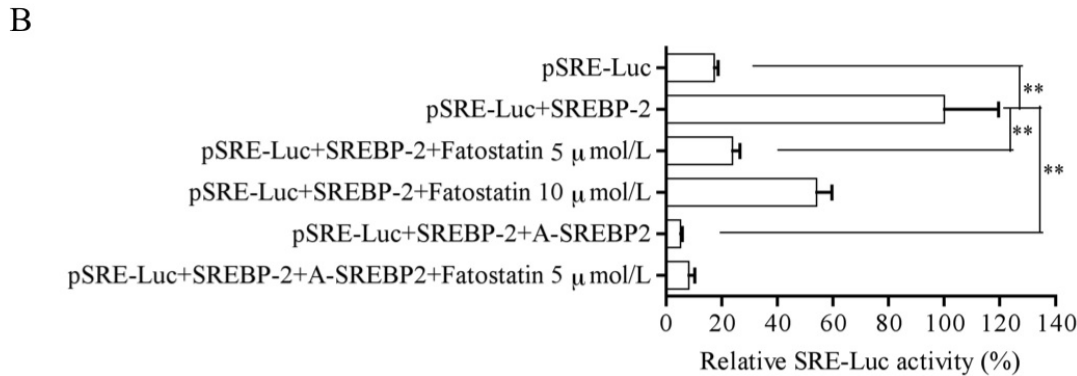

Supplementary Figure S4

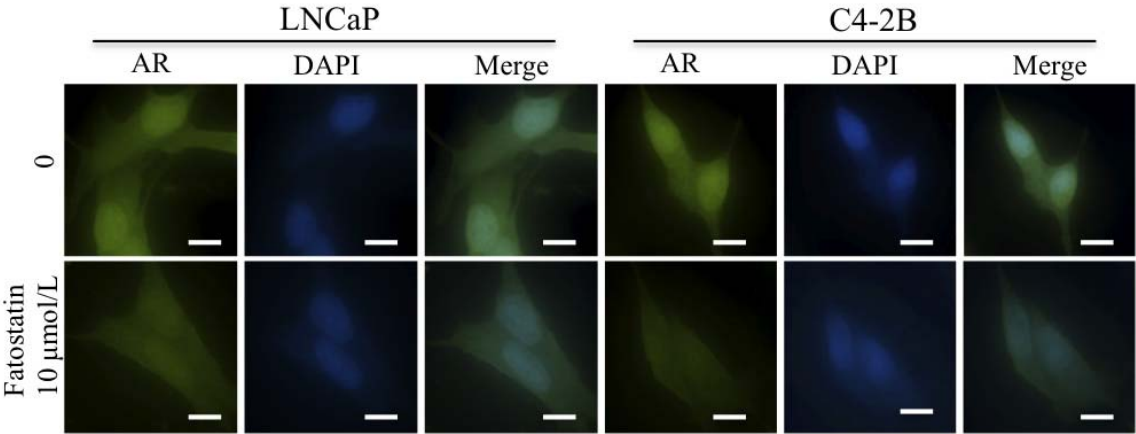

Supplement: 15357163mct130797-sup-mct-13-0797__mats_meth_fig_1_to_4_tab_1.pdf [file 15357163mct130797-sup-mct-13-0797__mats_meth_fig_1_to_4_tab_1.pdf]
